# Supplementary material
Source: ML conference proceedings conference paper supplement (https://openreview.net/forum?id=C3Rdf47byE)
Supplement: supplementary_material [file author_withdrawal_notice.pdf › supplementary_materials/author_withdrawal_notice.pdf]

# Author Withdrawal Notice

Crafting Culturally Aligned Narratives: Large Language Models for Arabic Children’s Story Generation

## 1 Author Withdrawal Notification

This document formally acknowledges the withdrawal of two authors from the camera-ready version of the manuscript titled “*Crafting Culturally Aligned Narratives: Large Language Models for Arabic Children’s Story Generation*”.

### 1.1 Withdrawn Authors

The following authors have requested removal of their names from the camera-ready paper:

1. **HADJ AMEUR Mohamed Seghir**
2. **Ahmed Guessoum**

Both authors have formally communicated their decision to withdraw from the publication.

### 1.2 Remaining Authors

The camera-ready version will list the following authors who retain full authorship rights:

1. **Houssam Eddine Boukhalfa**
2. **Selma Mani**
3. **Larbi Said Chikh**

## 2 Intellectual Property and Contribution Verification

We confirm that the withdrawal of the two authors does not affect the integrity or ownership of the research work:

### 2.1 Complete Ownership and Access

The remaining authors (Houssam, Selma, and Larbi) possess full ownership and access to all research materials, including:

- **Intellectual Property (IP):** All research concepts, methodologies, and innovations are documented and owned by the remaining authors
- **Data:** Complete dataset of 714 Arabic children’s stories with annotations
- **Code:** All source code for data processing, model training, evaluation scripts, and the Story4Kids application
- **Models:** Fine-tuned model weights and checkpoints for Silma 9B and Gemini 2.0
- **Evaluation Materials:** Human evaluation protocols, questionnaires, and collected assessments

## **2.2 Research Continuity**

The remaining authors have been directly involved in all aspects of the research:

- Dataset collection, curation, and annotation
- Model training and fine-tuning implementation
- Evaluation design and execution
- Paper writing and revision
- System implementation (Story4Kids application)

There is no disruption to research continuity, and the remaining authors are fully capable of:

- Responding to reviewer questions
- Providing supplementary materials
- Releasing code and datasets as promised
- Conducting future work and extensions

## **3 Publication Impact**

### **3.1 No Impact on Research Quality**

The withdrawal does not affect:

- The scientific validity of the findings
- The reproducibility of the research (all materials remain accessible)
- The completeness of the methodology and evaluation
- The ability to address reviewer feedback
- The public release of datasets and code

### **3.2 Camera-Ready Version**

The camera-ready manuscript will be submitted with:

- Updated author list reflecting the withdrawal
- All intellectual property properly attributed to the remaining authors
- Complete access to all research artifacts (data, code, models)
- Full compliance with conference publication requirements

## 4 Confirmation

We, the remaining authors, confirm that:

1. We respect the decision of HADJ AMEUR Mohamed Seghir and Ahmed Guessoum to withdraw from the publication
2. We have complete ownership and control of all research materials (IP, data, code, models, evaluations)
3. We are fully capable of supporting the publication and addressing any future inquiries
4. The research work remains complete and reproducible
5. There are no intellectual property disputes or concerns

### Remaining Authors:

Houssam Eddine Boukhalfa

Selma Mani

Larbi Said Chikh
